# Supplementary material
Source: publisher figshare collection journal article supplement (https://tandf.figshare.com/ndownloader/files/39643989)
Supplement: Supplementary file 1 [file 39643989]

**Supplementary Material**

**Investigation of the dual role of acyl phloroglucinols as a new hope for antibacterial and anti-SARS-CoV-2 agents using an integrated in vitro and in silico approach**

Wahyu Eko Prasetyo, Triana Kusumaningsih*, Bram Triadmojo, Septin Dwi Anggraini, Soerya Dewi Marliyana, and Maulidan Firdaus

Department of Chemistry, Faculty of Mathematics and Natural Sciences, Sebelas Maret University, Jl. Ir. Sutami No.36A, Surakarta, 57126, Indonesia

* Corresponding Author: [triana_kusumaningsih@staff.uns.ac.id](mailto:triana_kusumaningsih@staff.uns.ac.id)

ORCID: <http://orcid.org/0000-0002-5795-0125>

**ESI 1. Materials and methods**

All chemicals, including*,* phloroglucinol (≥99.0%), acylating agents (acetic anhydride (99.5%), isobutyryl chloride (98%), and isovaleryl chloride (98%)), methanol (MeOH), hexane (Hex), ethyl acetate (EtOAc), hydrogen chloride (HCl) and sodium sulphate anhydrous (Na2SO4), were obtained from Sigma-Aldrich Merck. 1H NMR (500 MHz) and 13C NMR (100 MHz) spectra were recorded on the Agilent DD2 NMR Spectrometer instrument in CDCl3 as a solvent with Tetramethyl silane (TMS) as the internal standard and were further analyzed using MestReNova (Mestrelab Research). The utilized strains, *S. aureus* ATCC 25923 and *E. coli* ATCC 25922 were obtained from the Microbiology Laboratory, Faculty of Medicine, Sebelas Maret University.

**ESI 2. 1H-NMR Spectra of compounds 2a-4c**


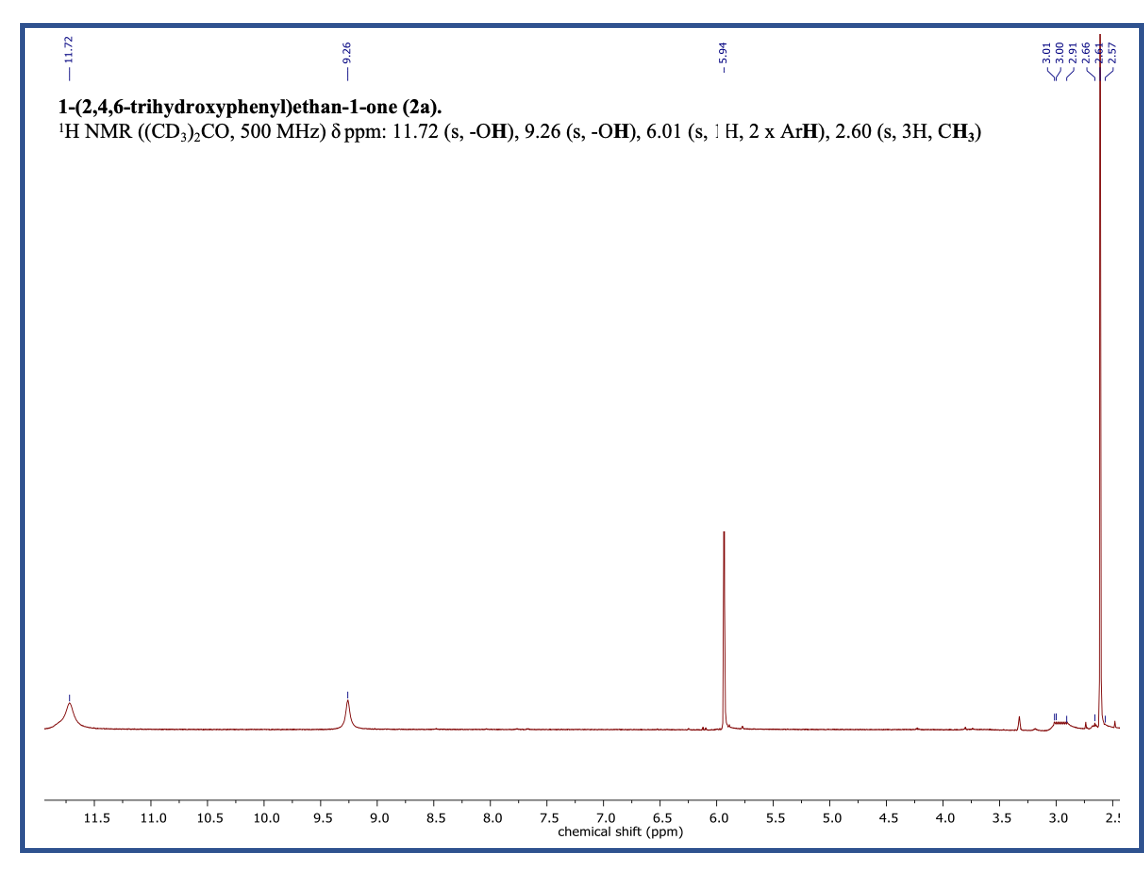


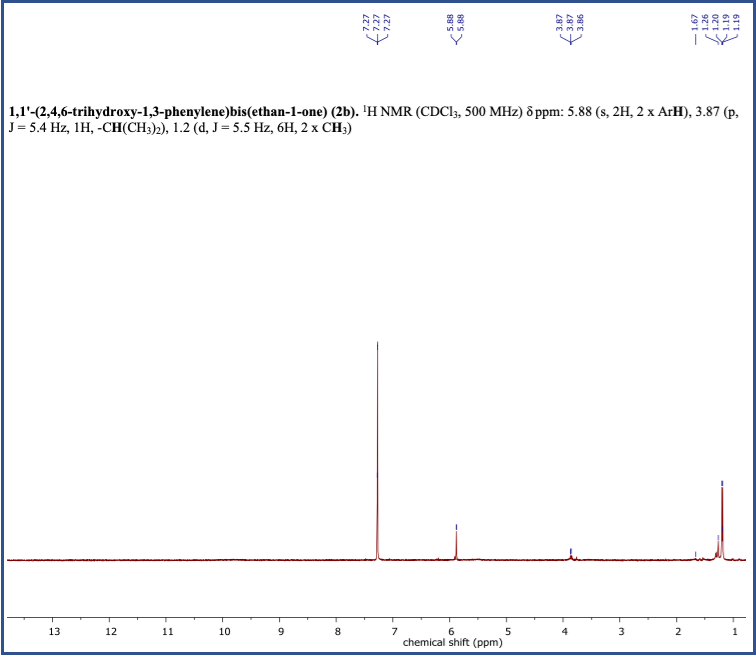


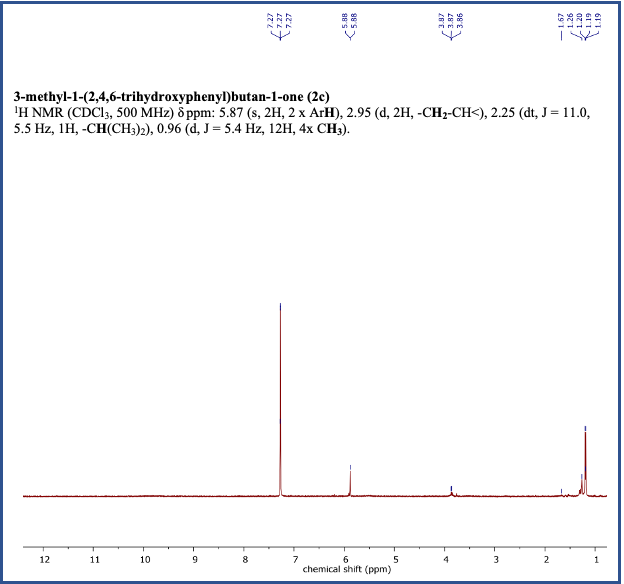


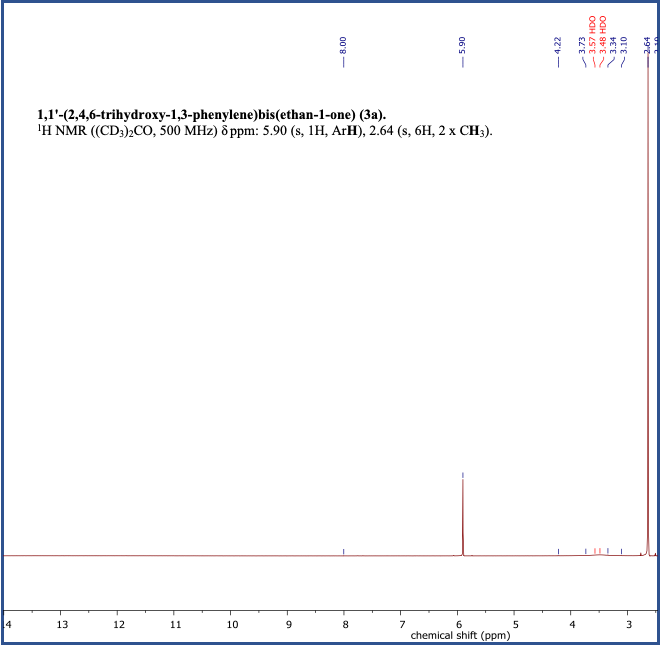


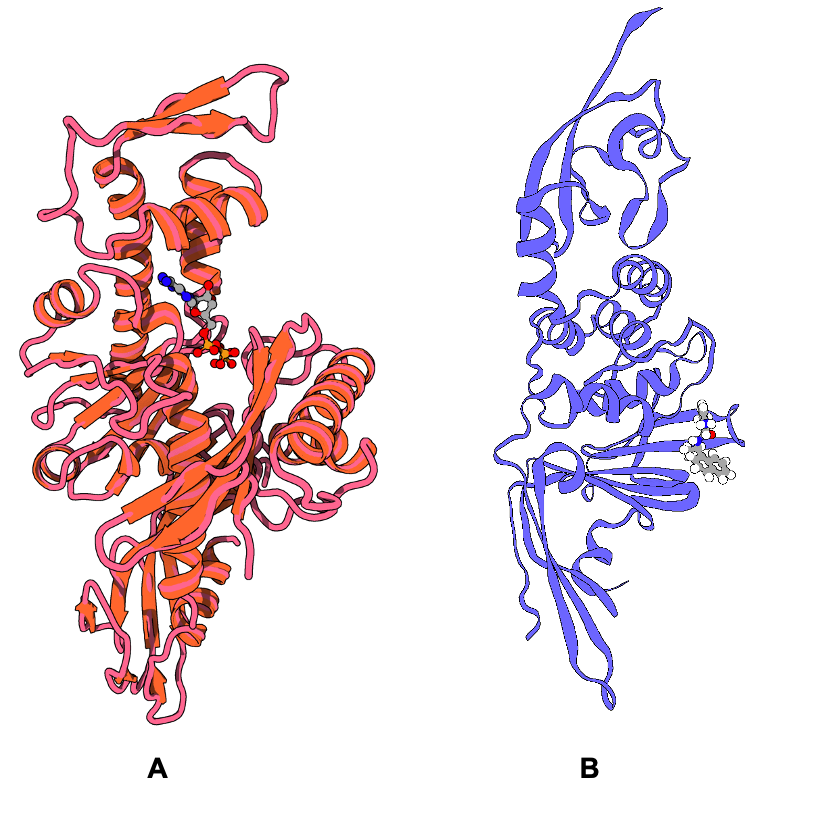


**Figure S1**. Crystal structure of *Staphylococcus aureus* FtsA complexed with ATP (PDB ID: 3WQU) (**A**) and SARS-CoV-2 PLpro complexed with TTT (PDB ID: 7CMD) (**B**)

**Figure S2**. Relative Gibbs free energy of **2a**, E = enol, K1 = keto 1, K2 = keto 2, and K3 = keto 3 forms


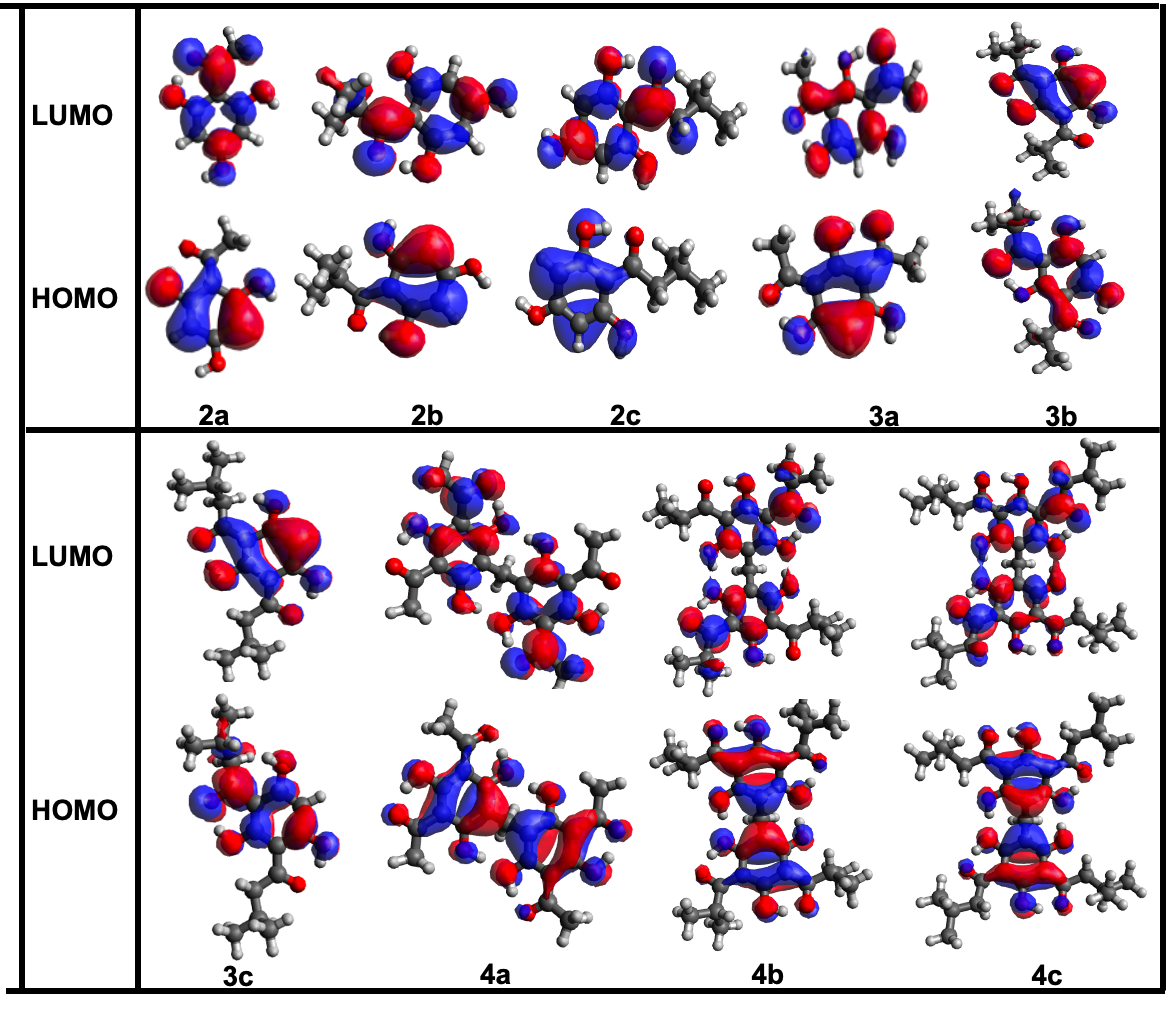


**Figure S3**. The surface of HOMO **→** LUMO of ACPLs **2a**–**4c**


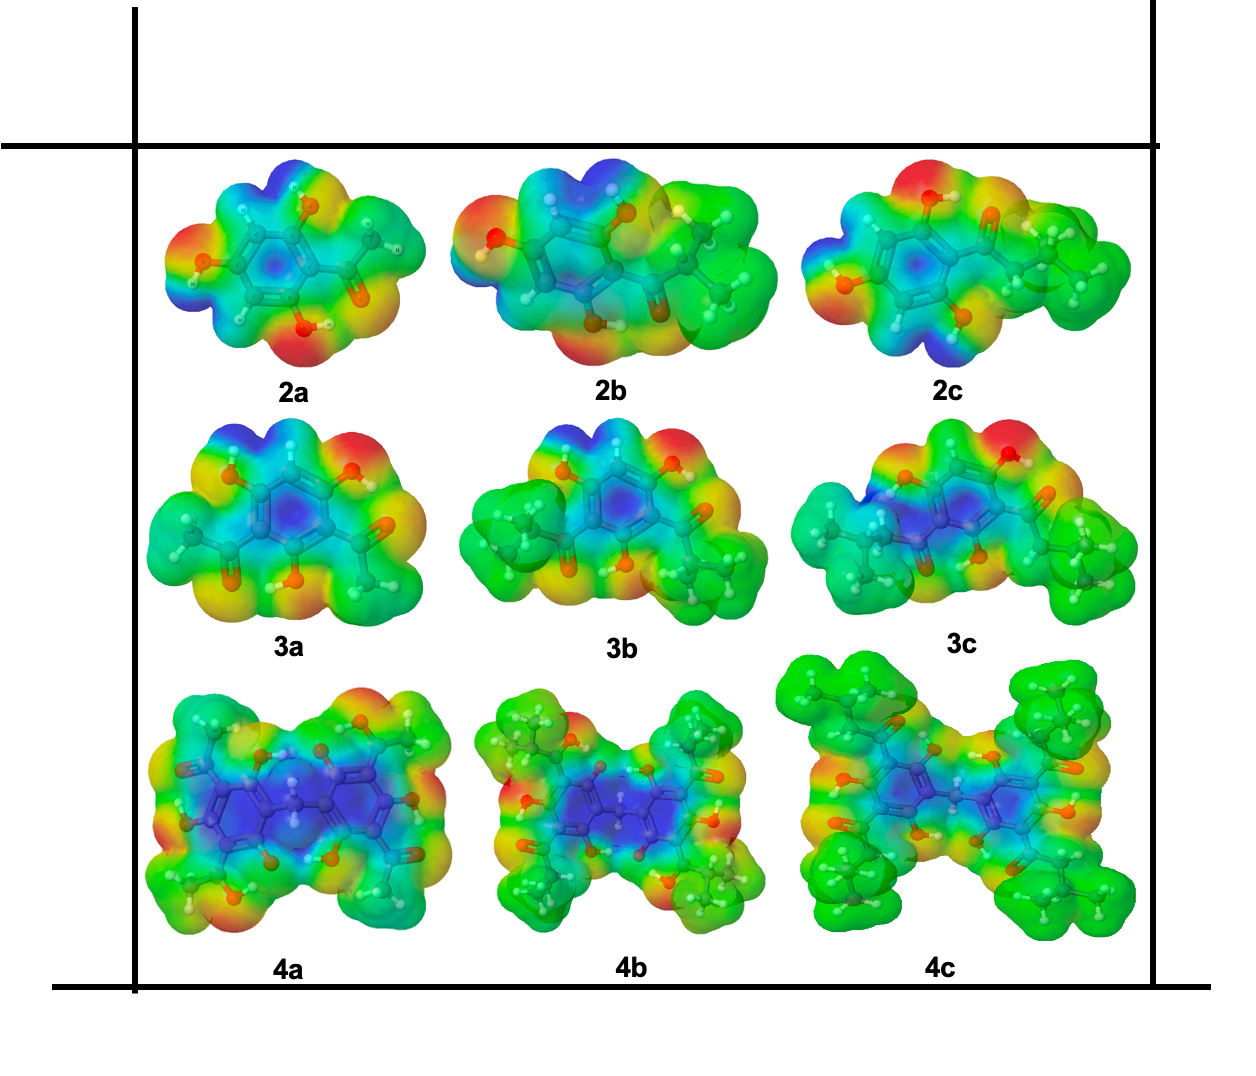


**Figure S4**. MEP maps of ACPLs **2a**–**4c** at the B3LYP/6-31G (d) of theory

**Figure S5**. 3D and 2D interactions of **3c** (**A**) and **4a** (**B**)

**
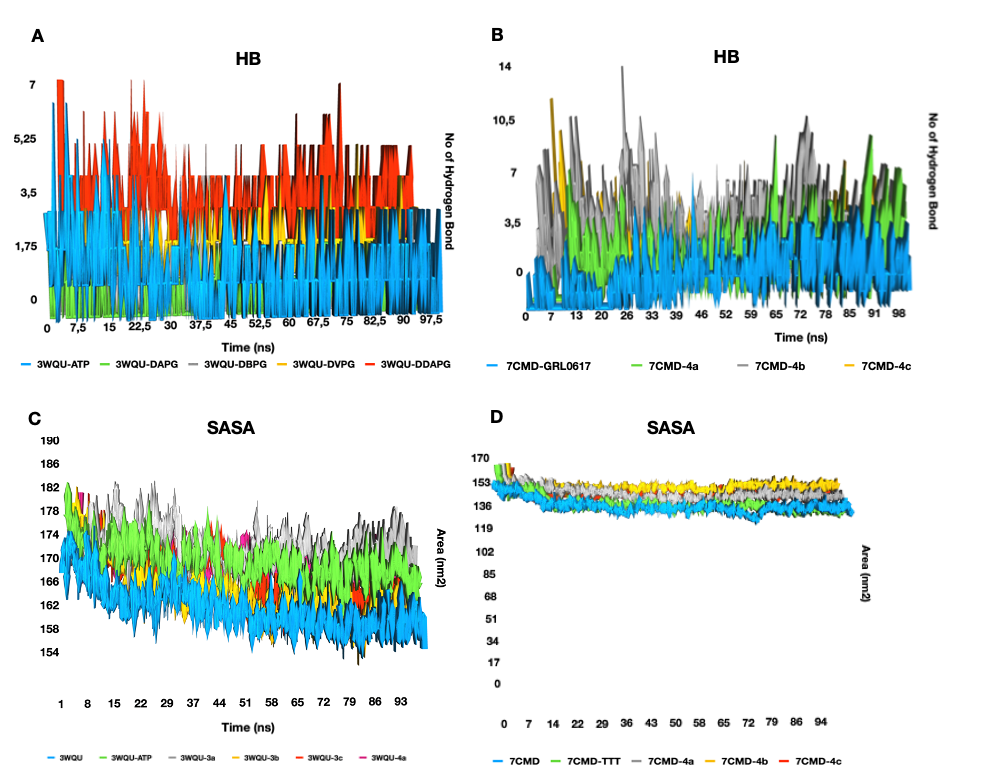
**

**Figure S6.** Molecular dynamics simulation of ACPLs **3a**, **3b**, and **3c** along with ATP in complex with the *S. aureus* FtsA protein: (**A**) Number of hydrogen bonding and (**C**) SASA. Molecular dynamics simulation of ACPLs **4a**, **4b**, and **4c** along with ATP in complex with the SARS-CoV-2 PLpro: (**B**) Number of hydrogen bonding and (**D**) SASA

**t = 0 ns**

**t = 25 ns**

**t = 50 ns**

**t = 75 ns**

**t = 100 ns**

**
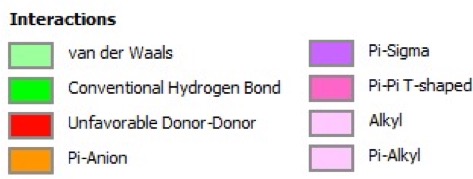
**

**Figure S7.** 2D binding mode of acylated phloroglucinols (**4a**, **4b**, and **4c**) along with GRL0617 into the SARS-CoV PLpro active site examined at regular time intervals of MD simulation. It was discovered that most of the residues were repeated at various times, generating non-covalent interactions. During the simulation period, amino acid residues Asp164 and Tyr273 were discovered to be critical residues making H-bonds with the ligand **4a**, whereas amino acid residues Tyr268, Gln269, and Tyr273 were revealed to be crucial residues forming H-bonds with the ligand GRL0617. On the other hand, initially, compound **4b** interacted with the receptor through hydrogen bonds with amino acid residues Pro248, Gly266, and Tyr273, but at the end of the simulation (t= 100 ns), ligand **4b** formed hydrogen interactions with other amino acid residues Asp164, Arg166, and Tyr273, while ligand **4c** only formed hydrogen bonds with Arg166. Throughout the simulation process, all ligands mostly interact with Tyr268 and Gln269 through the interaction of the T-shaped Pi-Pi and van der Waals, respectively. Intriguingly, at certain times, such as t = 0 ns, t = 25 ns, and t = 50 ns, compound **4b** also interacts with the crucial amino acid residues Tyr268 and Gln269 through hydrogen bond interactions.


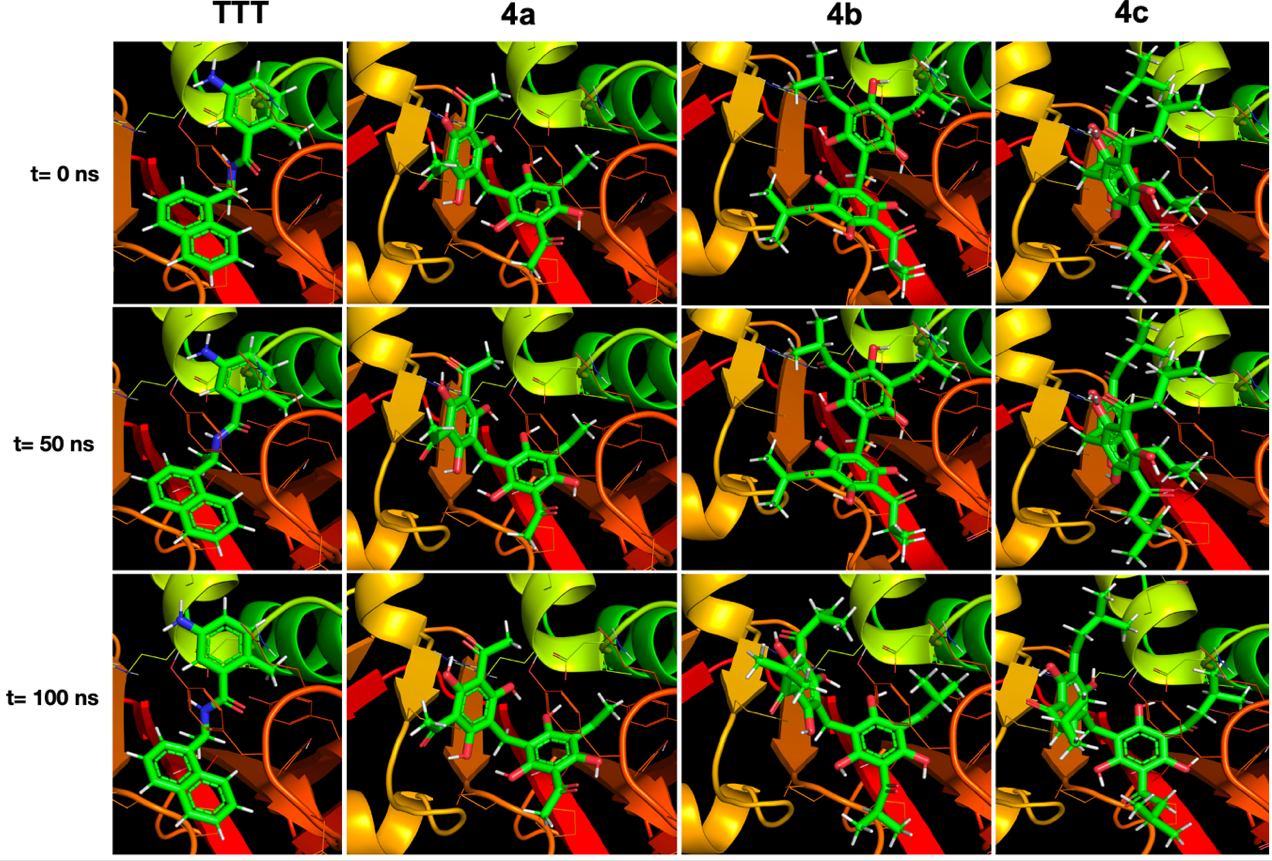


**Figure S8**. 3D binding mode of ACPLs **4a**, **4b**, and **4c** along with GRL0617 (TTT) into the SARS-CoV-2 PLpro active site at different time intervals of MD simulation

**
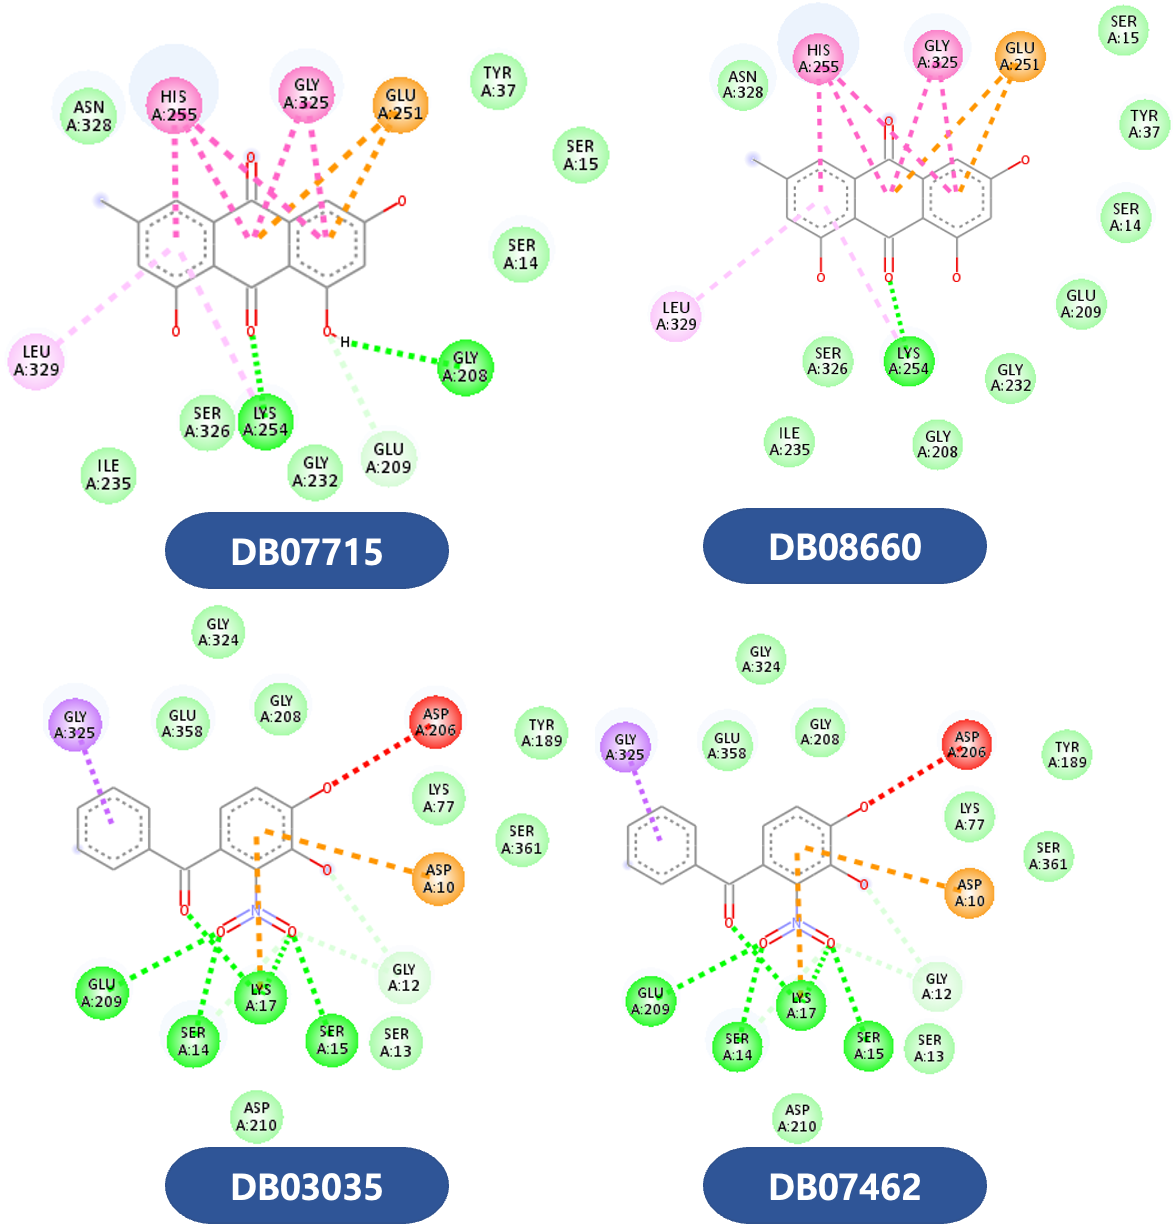
**

**
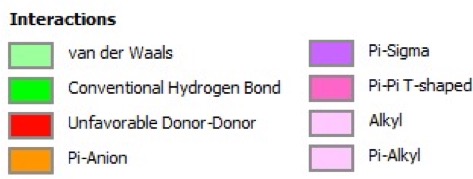
**

**Figure S9.** 2D binding mode of the four selected drugs into the *S. aureus* FtsA protein active site

**
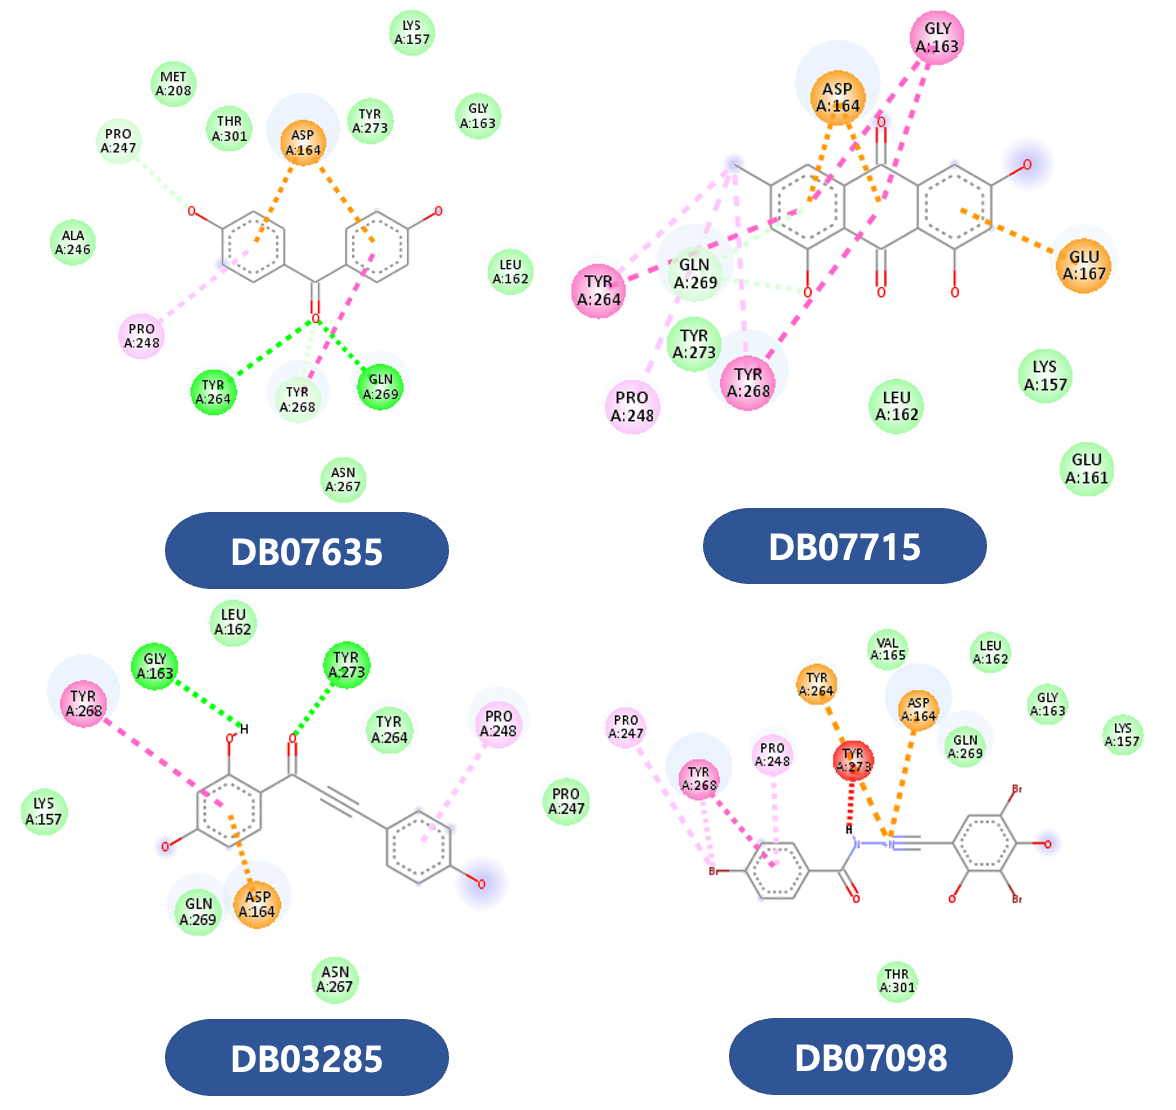
**

**
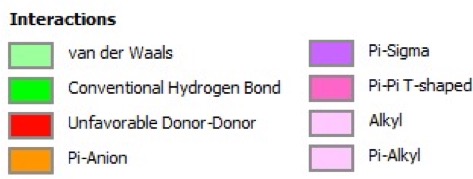
**

**Figure S10.** 2D binding mode of the four selected drugs into the SARS-CoV PLpro active site.

**
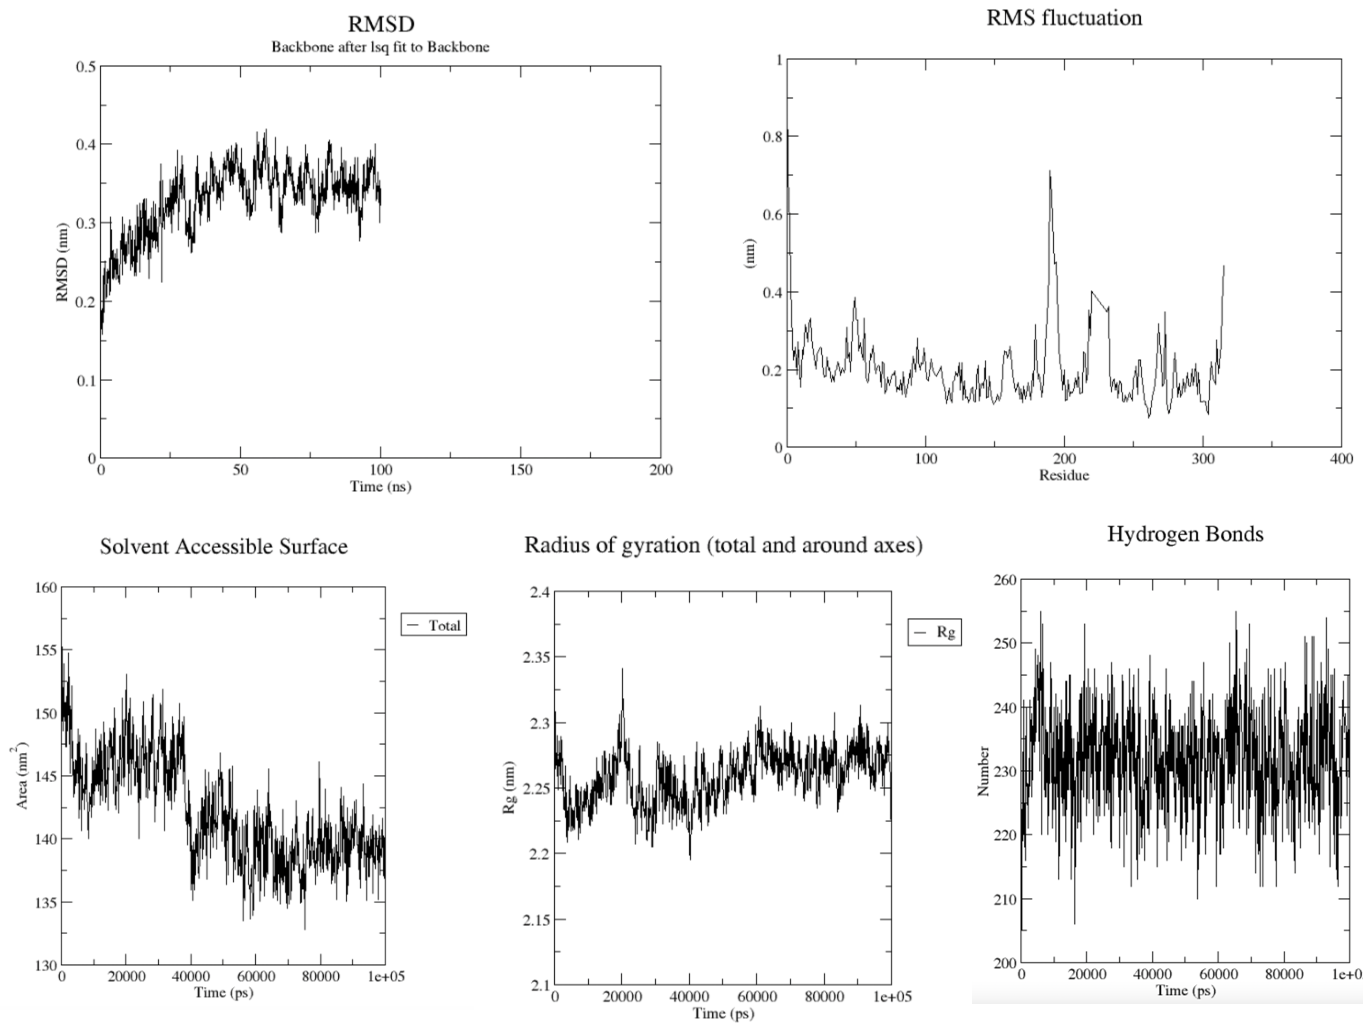
**

**Figure S11.** MD simulation result of the 7CMD-DB07635complexinto the SARS-CoV PLpro active site

**Figure S12.** Boiled-egg plot of WLOGP and TPSA of ACPLs **2a**-**4c**


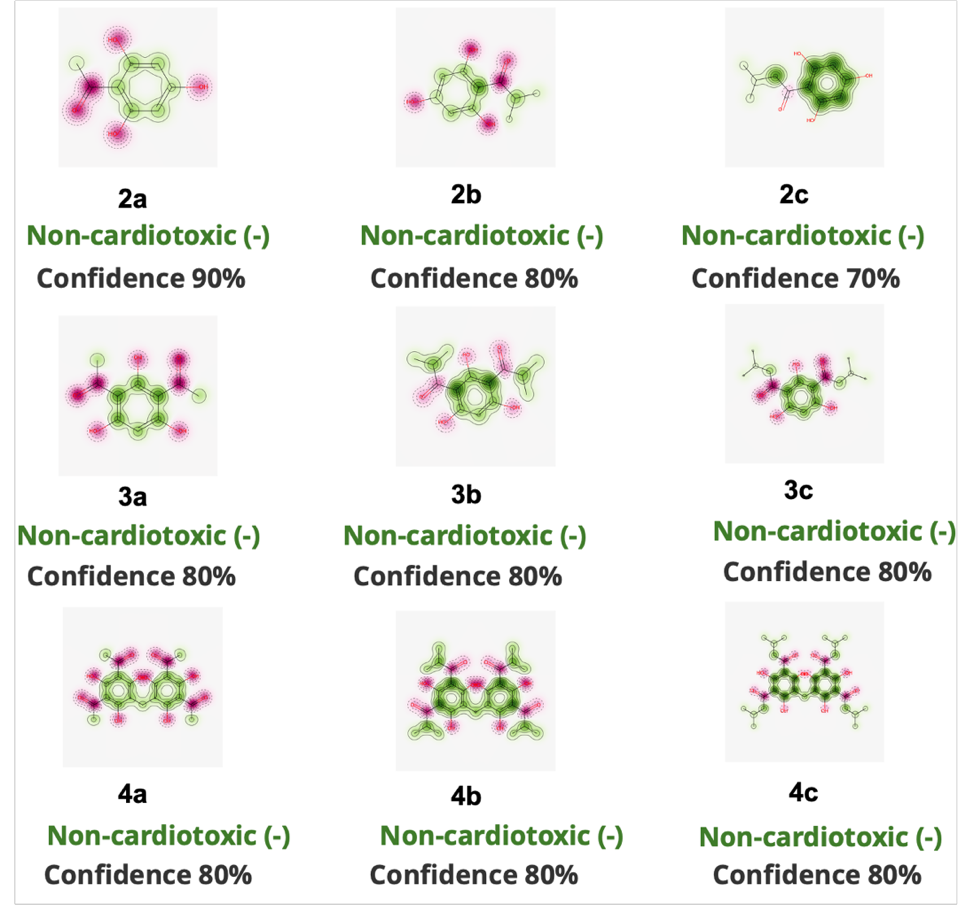


**Figure S13**. Cardiac toxicity of ACPLs **2a**-**4c** in map format generated from Pred-hERG 4.2 webserver


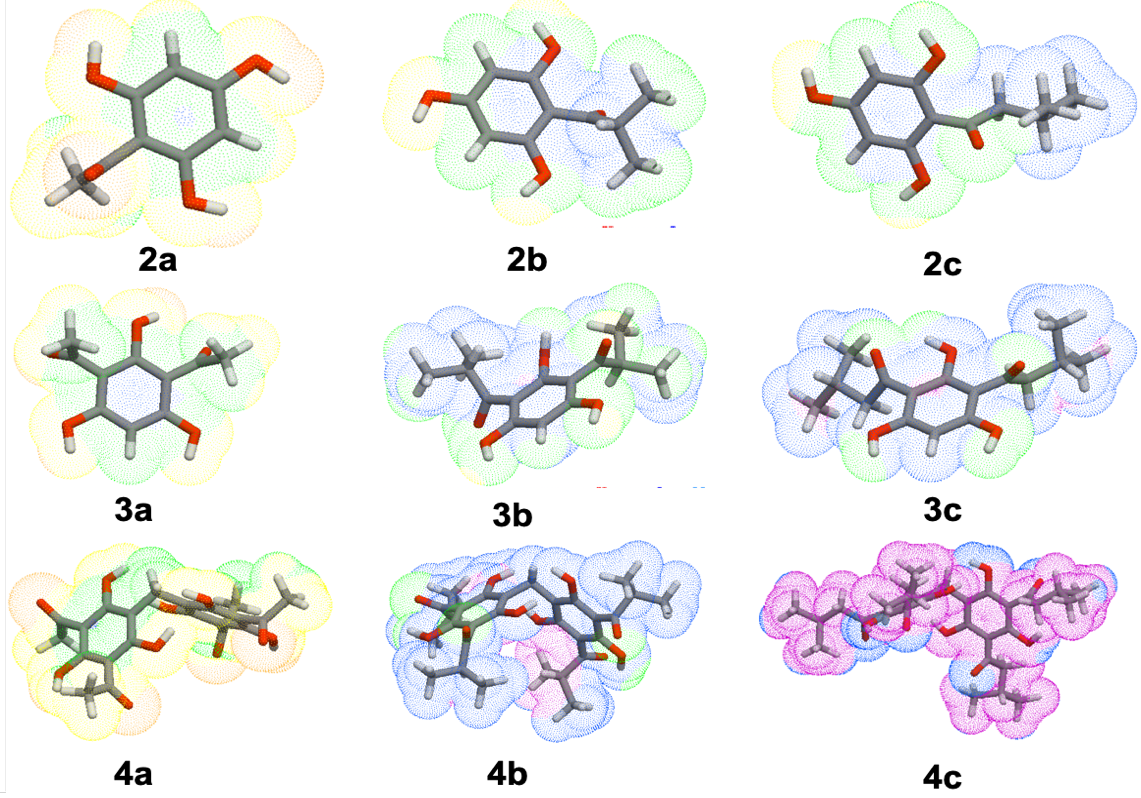


**Figure S14**. Molecular lipophilicity potential of ACPLs **2a**-**4c**. The most lipophilic zone is represented by purple and blue, whereas the intermediate lipophilic region is represented by green.


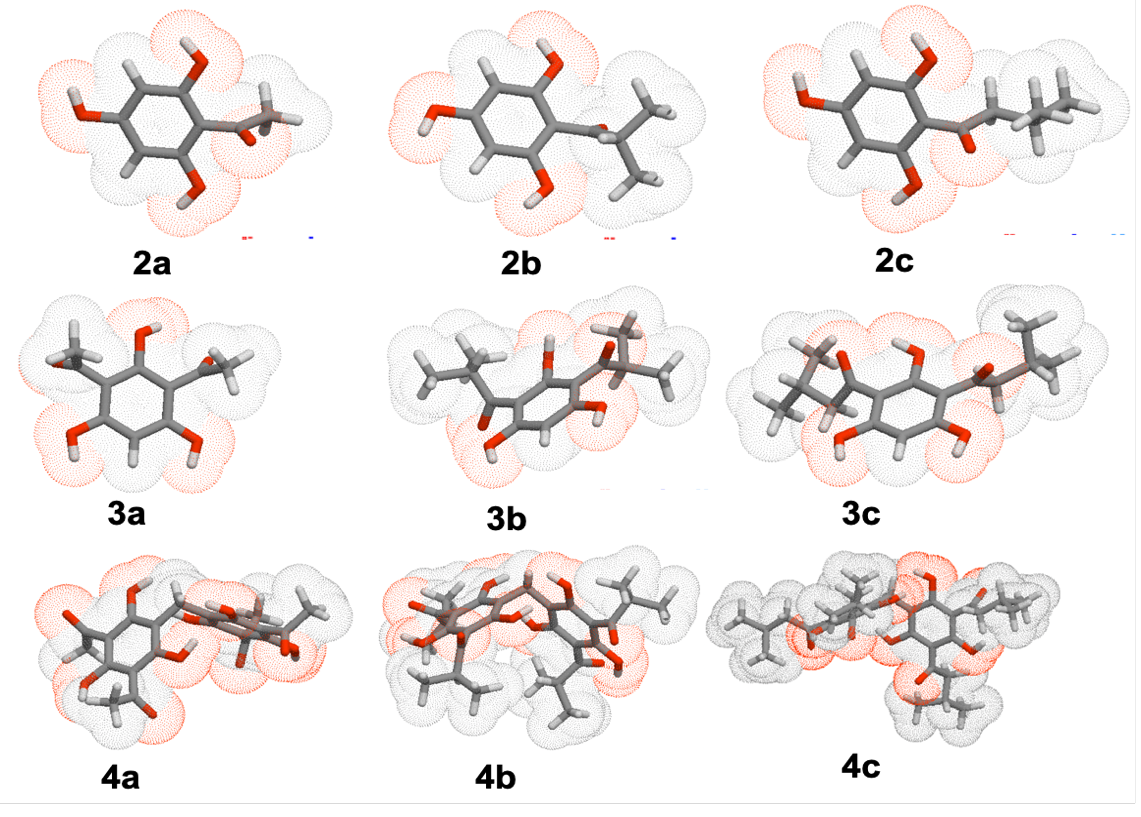


**Figure S15**. Polar surface area of ACPLs **2a**-**4c**. Most of the hydrophobic, nonpolar, and polar areas are encoded by blue, grey-white, and red colours, respectively

**Figure S16**. Molecular target prediction of ACPLs **2a**-**4c**

**Table S1**. SwissSimilarity scoring values of FDA-screened drugs along with binding affinities of screened docking complexes

| **DrugBank ID** | **Generic Name** | **Similarity Score** | **Δ*G*bind (kcal/mol)** | |
| --- | --- | --- | --- | --- |
| **3WQU** | **7CMD** |
| DB07635 | 4,4'-Dihydroxybenzophenone | 0.971 | -7.3 | -7.7 |
| DB11221 | Dioxybenzone | 0.967 | -7.7 | -7.2 |
| DB07715 | Emodin | 0.938 | -9.1 | -7.5 |
| DB08660 | Quinalizarin | 0.937 | -9.0 | -7.0 |
| DB03285 | Isoliquiritigenin | 0.894 | -8.4 | -7.5 |
| DB11396 | Dichlorophen | 0.827 | -8 | -6.8 |
| DB03035 | 1,8-di-hydroxy-4-nitro-anthraquinone | 0.722 | -8.7 | -7.1 |
| DB00756 | Hexachlorophene | 0.677 | -8.1 | -6 |
| DB07462 | (3,4-dihydroxy-2-nitrophenyl)(phenyl)methanone | 0.616 | -8.8 | -7.3 |
| DB07098 | 4-bromo-N'-[(1E)-(3,5-dibromo-2,4-dihydroxyphenyl)methylidene]benzohydrazide | 0.557 | -8.6 | -7.8 |
| DB03867 | 3-nitro-L-tyrosine | 0.538 | -7.4 | -6.5 |
| DB07044 | 3-bromo-N'-[(1E)-(3,5-dibromo-2,4-dihydroxyphenyl)methylidene]benzohydrazide | 0.525 | -8.3 | -7.2 |
| DB06950 | 4-chloro-N'-[(1E)-(3,5-dibromo-2,4-dihydroxyphenyl)methylidene]benzohydrazide | 0.508 | -8.5 | -7.4 |

**Table S2.** Part of the predicted anticancer activity spectra for ACPLs **2a**-**4c**

| **Compound** | **Antibacterial** | | **Antiviral** | |
| --- | --- | --- | --- | --- |
| **Pa** | **Pi** | **Pa** | **Pi** |
| **2a** | 0.385 | 0.034 | 0.220 | 0.080 |
| **2b** | 0.408 | 0.028 | 0.266 | 0.051 |
| **2c** | 0.378 | 0.036 | 0.297 | 0.038 |
| **3a** | 0.392 | 0.032 | 0.212 | 0.086 |
| **3b** | 0.415 | 0.027 | 0.260 | 0.054 |
| **3c** | 0.386 | 0.034 | 0.273 | 0.047 |
| **4a** | 0.390 | 0.033 | 0.266 | 0.051 |
| **4b** | 0.412 | 0.027 | 0.304 | 0.035 |
| **4c** | 0.387 | 0.033 | 0.338 | 0.026 |
